# Supplementary material
Source: PubMed Central journal article supplement (PMC4492381)
Supplement: 10.1534_115.176719_genetics.115.176719-2.pdf [file 10.1534_115.176719_genetics.115.176719-2.pdf]

**Table S2 Primers**

|                    |                                                              |
|--------------------|--------------------------------------------------------------|
| <b>hisA region</b> | 5'CCACGTCATCTTCAATTAGCTGT3' and 5'CACGAATAGGACAATCAAACGA3'   |
| <b>hisB region</b> | 5'GGTGGAAACAACCTCGTCGATAG3' and 5'CACGAAAACAACCAATTCGATACA3' |
| <b>hspA region</b> | 5'CACAAGCNGAATGTGAAAAACG3' and 5'AGTGTGCTTATCAAGGTAAAC3'     |
| <b>hspB region</b> | 5'CCATCAGCTTACAATAAYCGTGCAAG3' and 5'GGCATTAAATTCGCAATTTCC3' |

In order to verify the two substitutions between MA2 and CR2 in the hisB region, a 1 kb interval containing them was amplified with primers: 5'GTAAAGGTCTTGGTAAAGGTGGT3' and 5'GCACATTCAGTTGGTGATTGTA3'
