# Supplementary material
Source: PubMed Central journal article supplement (PMC4492381)
Supplement: 10.1534_115.176719_genetics.115.176719-6.pdf [file 10.1534_115.176719_genetics.115.176719-6.pdf]

**Table S3** Pairwise differences between the 14 kb mitochondrial genomes of the six members of Clade 1

|    | MA          | MM          | CR         | HR          | LH          | MQ    |
|----|-------------|-------------|------------|-------------|-------------|-------|
| MA | --          | 5/1         | 191/2      | 5/1         | 30/2        | 35/1  |
| MM | <i>0.04</i> | --          | 192/3      | 3/0         | 29/1        | 34/2  |
| CR | <i>1.4</i>  | <i>1.4</i>  | --         | 191/3       | 207/4       | 190/5 |
| HR | <i>0.04</i> | <i>0.02</i> | <i>1.4</i> | --          | 31/1        | 32/2  |
| LH | <i>0.22</i> | <i>0.21</i> | <i>1.5</i> | <i>0.22</i> | --          | 47/3  |
| MQ | <i>0.26</i> | <i>0.26</i> | <i>1.4</i> | <i>0.26</i> | <i>0.33</i> | --    |

Above the diagonal: the number of substitutions above the slash marks and the number of indels below. Below the diagonal, in italics: the percent difference, counting substitutions and indels together. Based on full mitochondrial sequences from Lasek-Nesselquist 2012.
