# Supplementary material
Source: PubMed Central journal article supplement (PMC4492381)
Supplement: 10.1534_115.176719_genetics.115.176719-7.pdf [file 10.1534_115.176719_genetics.115.176719-7.pdf]

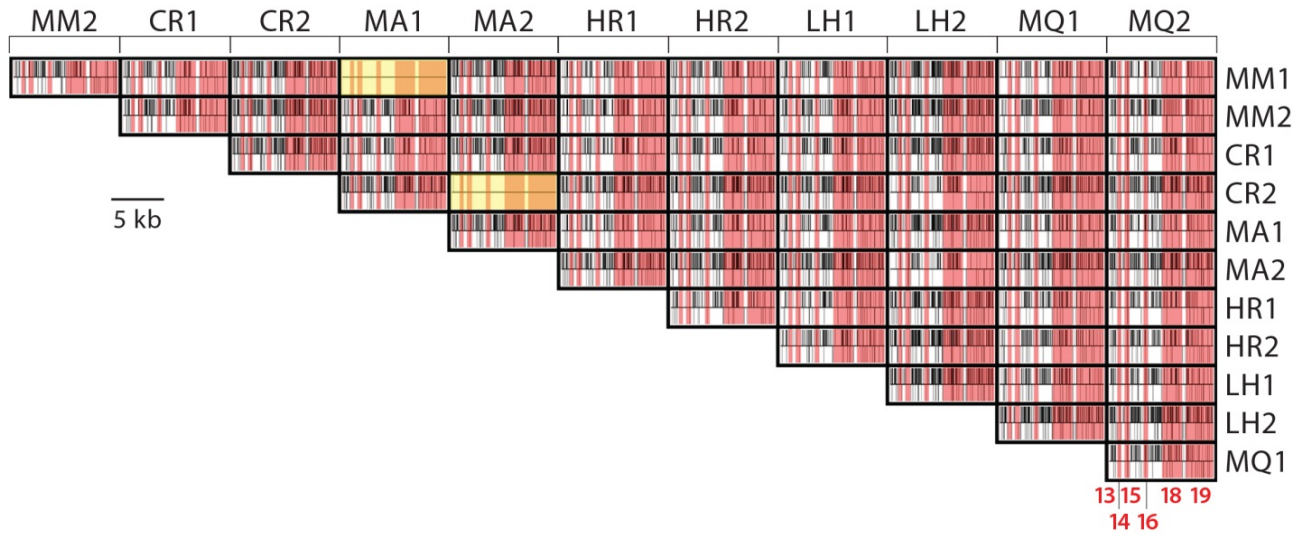

**Figure S1** Pairwise differences between sequences of the six members of Clade 1 in the 9.7 kb *hisB* region. Substitutions are indicated by thin vertical lines above, indels by lines below. Genes are shaded in red. As shown in the two cells with yellow background, the sequences of MA1 and MM1 are identical and the sequences of MA2 and CR2 differ by two substitutions, one between genes 13 and 14 and the other in an intron of gene 14. All other pairwise differences are spread throughout the region. There are no indels or stop codons in any exon of any annotated gene except for three 14-28 aa deletions in an exon of gene 18, a poorly supported putative osteopetrosis-associated gene. Gene numbers and annotation are from Hur *et al.* 2009.
